# Supplementary material for: Impact of a candidate vaccine on the dynamics of salmon lice (Lepeophtheirus salmonis) infestation and immune response in Atlantic salmon (Salmo salar L.)
Source: PubMed Central journal article supplement (PMC7531828; doi:10.1371/journal.pone.0239827), 2020-10-02

# PCA analysis- Spleen

A

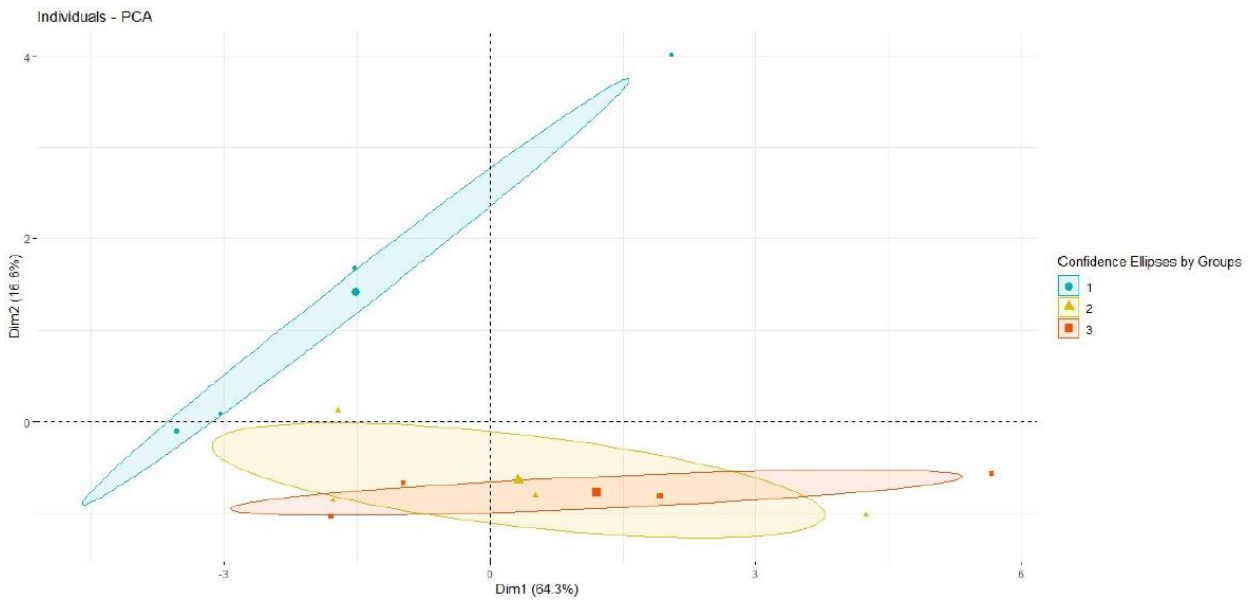

B

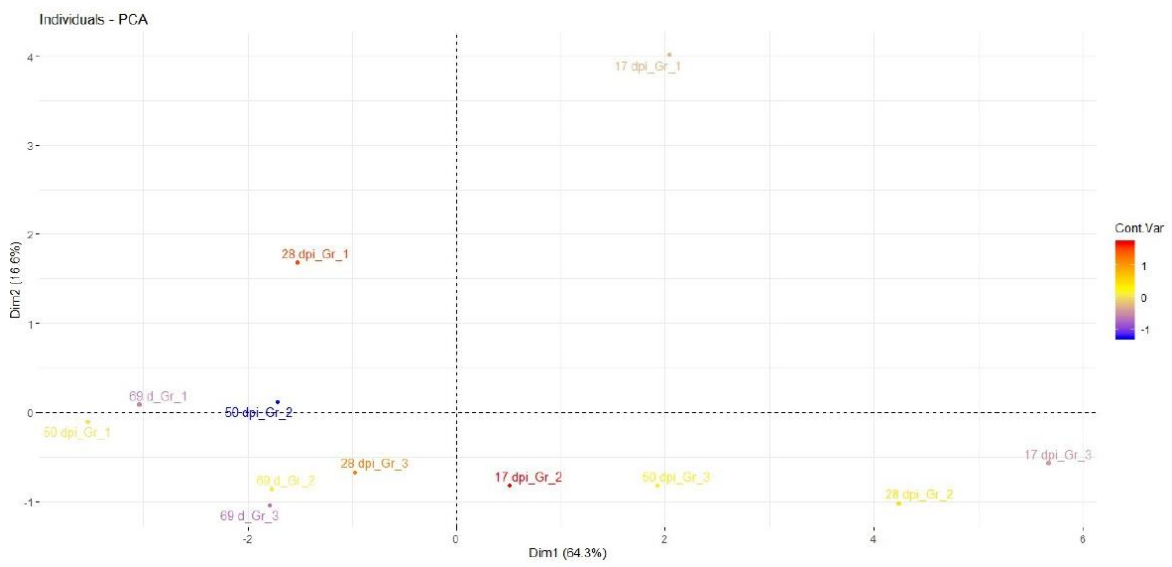

C

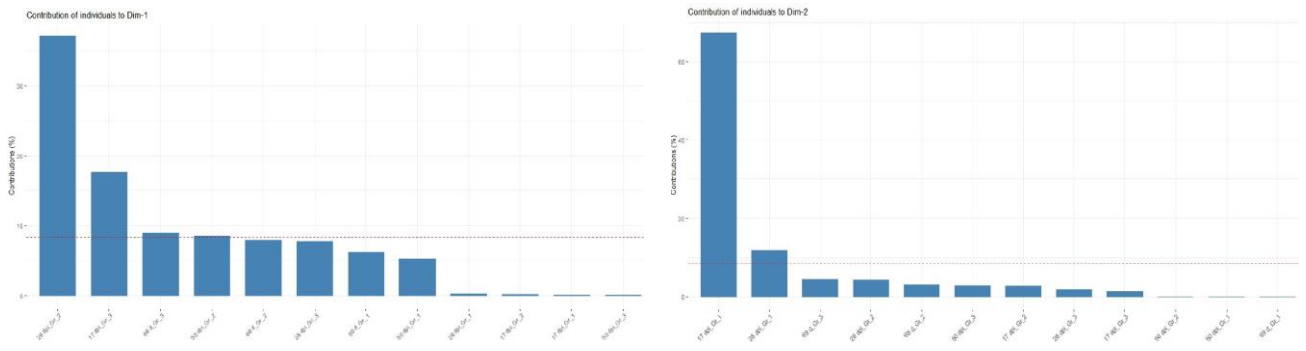

D

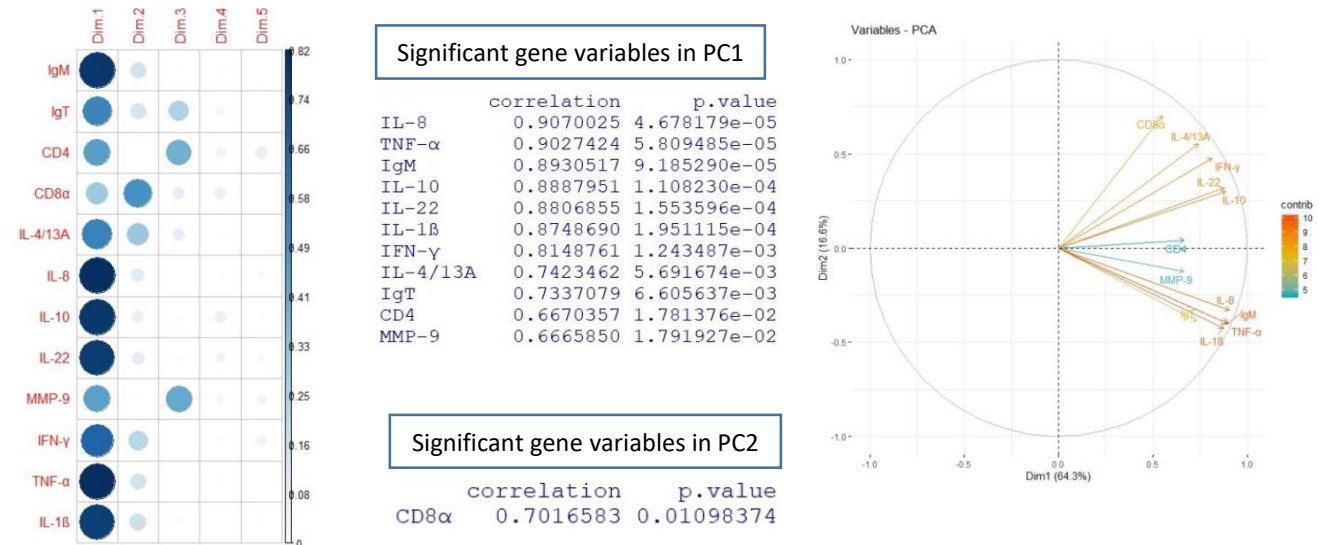

Supplement: pone.0239827.s003.pdf [file pone.0239827.s003.pdf]
